# Supplementary material for: MicroRNA-138 modulates glioma cell growth, apoptosis and invasion through the suppression of the AKT/mTOR signalling pathway by targeting CREB1
Source: PubMed Central journal article supplement — Oncol Rep. 2020 Oct 15;44(6):2559–68. doi: 10.3892/or.2020.7809 (PMC7640360; doi:10.3892/or.2020.7809), 2020-10-15

Figure S1. Effects of SH-5 (AKT inhibitor) on miR-138 expression in U87 and U251 glioma cells. U87 and U251 cells ( $n \geq 3$ ) were pre-treated with SH-5 ( $10 \mu\text{M}$ ) for 2 h and miR-138 expression was measured by RT-qPCR analysis. The results indicated that the expression level of miR-138 in U87 and U251 cells did not change following SH-5 treatment.

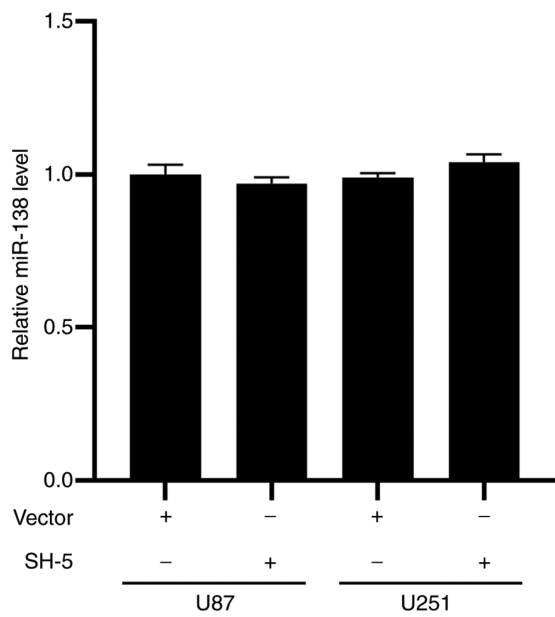

Supplement: Supplementary_Data.pdf [file Supplementary_Data.pdf]
